# Supplementary material
Source: PubMed Central journal article supplement (PMC2700911)
Supplement: 0900110106_0900110106SI.pdf [file 0900110106_0900110106SI.pdf]

# Supporting Information

Fischer et al. 10.1073/pnas.0900110106

## SI Methods

**Remotely Sensed Data.** Images from the French SPOT were used to create a 10-m resolution map of tree cover. We used 31 natural color orthomosaics of 2.5-m resolution and six 10-m, 4-band multispectral images from 2004 and 2005. Each was individually classified in ENVI (ITT Visual Information Solutions) 4.3 to 15 to 20 classes by using a standard unsupervised Isodata algorithm. Using ArcGIS (ESRI), the classes for each image were then visually aggregated into 2 classes: woody and nonwoody vegetation. We mosaicked the 37 overlapping, 2-class layers to a seamless 10-m resolution layer, prioritizing input layers based on their local performance. The 10-m data effectively delineated the crowns of many individual large trees but often underpredicted tree cover in sparsely vegetated areas with small tree crowns. The 2.5-m data had more predictive power in areas with scattered trees, but they occasionally classed shadows and high-vigor crops as trees. The final mosaic captured scattered trees and woodlands in the lower slope areas very well ( $\approx 80\%$  of the landscape, including all land dominated by farming). Performance was low only in areas of complex topography (where farming was not a dominant land use). A visual indication of the performance of the classification is given in Fig. S1. A formal assessment of the classification showed a highly significant relationship between the number of trees present on the ground and remotely sensed percent tree cover (for details, see data analysis section in *Methods*, Fig. 1B, and Table S1).

**Tree Identification.** Some species were grouped because (i) they were difficult to distinguish in the field and/or may hybridize (1), or (ii) they were uncommon in our sites. Tree species that were grouped were White Box (*Eucalyptus albens*; common) and Grey Box (*Eucalyptus microcarpa*; very uncommon; combined total individuals measured, 362); Blakely's Red Gum (*Eucalyptus blakeyi*; very common), Dwyer's Red Gum (*Eucalyptus dwyeri*; uncommon), and River Red Gum (*Eucalyptus camaldulensis*; very uncommon; combined total, 818); 2 species of Long-leaved Box (*Eucalyptus goniocalyx* and *Eucalyptus nortonii*; combined total, 449); and "other gums" (*Eucalyptus mannifera* and *Eucalyptus rossii*; combined total, 215). Additional species encountered, in decreasing order of abundance, were Red Stringybark (*Eucalyptus macrorhyncha*; 689 trees), Yellow Box (*Eucalyptus melliodora*; 581 trees), Red Box (*Eucalyptus polyanthemus*; 384 trees), Apple Box (*Eucalyptus bridgesiana*; 129 trees), and Red Ironbark (*Eucalyptus sideroxylon*; 68 trees).

**Diameter Measurements.** The diameter at breast height of trees was measured at 130 cm above ground. For trees with multiple stems, the diameter of each stem was measured. Before analysis, first, tree diameters were adjusted to combine measurements from single-stemmed and multistemmed trees. To account for multiple stems, the basal area at breast height of each tree was calculated. We then calculated the diameter of an equivalent single-stemmed tree with the same basal area as:

$$DBH_{\text{equiv}} = 2 \sqrt{AREA_{\text{basal}} / \pi}$$

Second, tree diameters were standardized to account for different tree species growing to different diameters. Ideally, we would have estimated the age of each individual tree from its diameter, but such relationships are highly uncertain and are published only for 1 species, Yellow Box (2). A key problem is that the growth of eucalypt diameters is approximately linear until the

age of 100 years, but after that it slows down (2). Assuming that different trees grow to different diameters but that the shape of their growth curves is similar as they age, we standardized diameters as follows. For each species, we identified all trees with a basal area above the 95th percentile observed for that species. We calculated the mean basal area of those trees, which acted as a proxy for the basal area of a representative "very old tree" of a given species. We converted this basal area into a diameter by using the formula above. We then scaled the diameter of each tree by dividing it by the estimated diameter of a very old tree of the same species. By definition, more than 95% of the resulting unit-free index values were between 0 and 1. For our graphs, we multiplied these unit-free index values by 165 cm, which was the estimated diameter for a very old Yellow Box tree. In summary, our procedure scaled all tree diameters to one reference species (Yellow Box) to allow effective comparison of tree diameters (and relative ages) between different sites.

We acknowledge that the same species can grow at different rates at different sites (3). However, we believe this to be a relatively minor problem for 3 reasons. First, woodlands are relatively open by definition, so that suppressed growth due to high stem density is less likely than in denser forest systems. Second, published differences in growth rates for Yellow Box between different sites were relatively minor (2), compared with much more pronounced between-species differences. Third, major differences in site conditions typically express themselves via species turnover, and we did standardize diameters for differences between species (see above).

**Estimation of Tree Density.** In paddock sites and scattered tree sites, all individual trees were identified and measured. The total count of trees was a direct measurement of tree density at the site.

In woodland sites, a sample of 64 trees was measured by using a distance sampling protocol. Eight "random points" were arbitrarily distributed throughout each site before field work and without reference to satellite imagery that would have revealed the spatial distribution of trees. In the field, 8 sectors of 45° each were delineated around each random point, starting at magnetic north. Within each sector, the closest tree was identified, and the distance to this tree from the random point was measured. Assuming random dispersal of stems throughout the site, the distance measurements were used to calculate the number of trees in the site, following the formula for an unbiased estimate of point-centered density in Pollard (4). We consider that random dispersal of trees was a reasonable assumption in woodland sites, because unlike in some Northern Hemisphere ecosystems (3), regeneration usually is not highly clumped in woodland sites.

At each site, based on the approximate total number of trees, the proportions of trees sampled in different diameter classes (in 20-cm intervals) and of different species were used to estimate the actual number of trees representing each different species and diameter class.

**Tree Community Composition.** We calculated a "tree species profile" for each site to summarize the mix of species present at each site in a single number for use as a covariate in statistical analyses. We constructed a matrix of sites by tree species, where each cell contained the estimated integer number of individuals belonging to a particular tree species at a particular site. We applied simple correspondence analysis to this matrix (5). The

first principal axis had a canonical correlation of 0.76, suggesting it was a reasonable univariate summary of the underlying multivariate data. Correspondence analysis sorted species along an ecologically meaningful gradient, represented by Apple Box and Yellow Box at the one end (typical foothill species) and Red Ironbark, Red Box, and Red Stringybark at the other end (typical ridgetop species). Each site's row score was interpreted as its tree species profile.

**Soil Chemistry.** At each site, the same 8 random points used for tree measurements (see estimation of tree density, above) were used for topsoil sampling in early 2008. Around each random point, we located 4 canopy gaps  $\approx 10$  m from the random point and  $>10$  m from one another. At each of the resulting 32 locations, we obtained 2-cm diameter cores to a depth of 7 cm. We obtained samples from canopy gaps whenever possible because soil nutrients are typically enriched underneath the canopy of trees (6). Therefore, locating samples without reference to canopy cover would have systematically inflated the

recorded nutrient levels of woodland sites compared with the more open paddock or scattered tree sites, thus confounding the effects of tree cover with the effects of topsoil nutrients. The 32 samples from each site were mixed into a single site-level sample. Soils were air-dried for several weeks before analysis. A range of attributes were quantified, but we focus here on available phosphorus and total nitrogen. Available phosphorus was quantified by using the Colwell method (ref. 7, p. 64). Total nitrogen was quantified by using wet oxidation (the Kjeldahl method), using the Technicon Autoanalyzer II, industrial method no. 329-74W/B. We acknowledge that it would have been informative to analyze soil samples for their nitrate content, rather than simply focusing on total nitrogen. Nitrate may exert a stronger influence on vegetation dynamics than total nitrogen per se (8). However, we could not quantify soil nitrate because (i) we were unable to obtain samples over a short enough time period that would avoid seasonal changes in nitrate levels (9), and (ii) given our large study area and the lack of access to reliable refrigeration, soil nitrate levels may have altered during transport and initial storage in the field.

1. Costermans L (2000) *Native Trees and Shrubs of South-eastern Australia* (Reed New Holland, Sydney).
2. Banks JCG (1997) in *The Coming of Age—Forest Age & Heritage Values*, ed Dargavel J (Environment Australia, Canberra, Australia), pp 17–28.
3. Pulido FJ, Diaz M, de Trucios SJH (2001) Size structure and regeneration of Spanish holm oak *Quercus ilex* forests and dehesas: Effects of agroforestry use on their long-term sustainability. *For Ecol Manage* 146:1–13.
4. Pollard JH (1971) On distance estimators of density in randomly distributed forests. *Biometrics* 27:991–1002.
5. Greenacre MJ (1993) *Correspondence Analysis in Practice* (Academic, London).
6. Wilson BR, Grown I, Lemon J (2007) Scattered native trees and soil patterns in grazing land on the Northern Tablelands of New South Wales, Australia. *Aust J Soil Res* 45:199–205.
7. Rayment GE, Higginson RR (1992) *Australian Laboratory Handbook of Soil and Water Chemical Methods* (Inkata Press, Melbourne).
8. Prober, SM, Lunt ID, Morgan JW (2008) in *New Models for Ecosystem Dynamics and Restoration*, eds Hobbs RJ, Suding K (Island Press, Washington, DC), pp. 156–168.
9. Prober SM, Thiele KR, Lunt ID, Koen TB (2005) Restoring ecological function in temperate grassy woodlands: Manipulating soil nutrients, exotic annuals and native perennial grasses through carbon supplements and spring burns. *J Appl Ecol* 42:1073–1085.



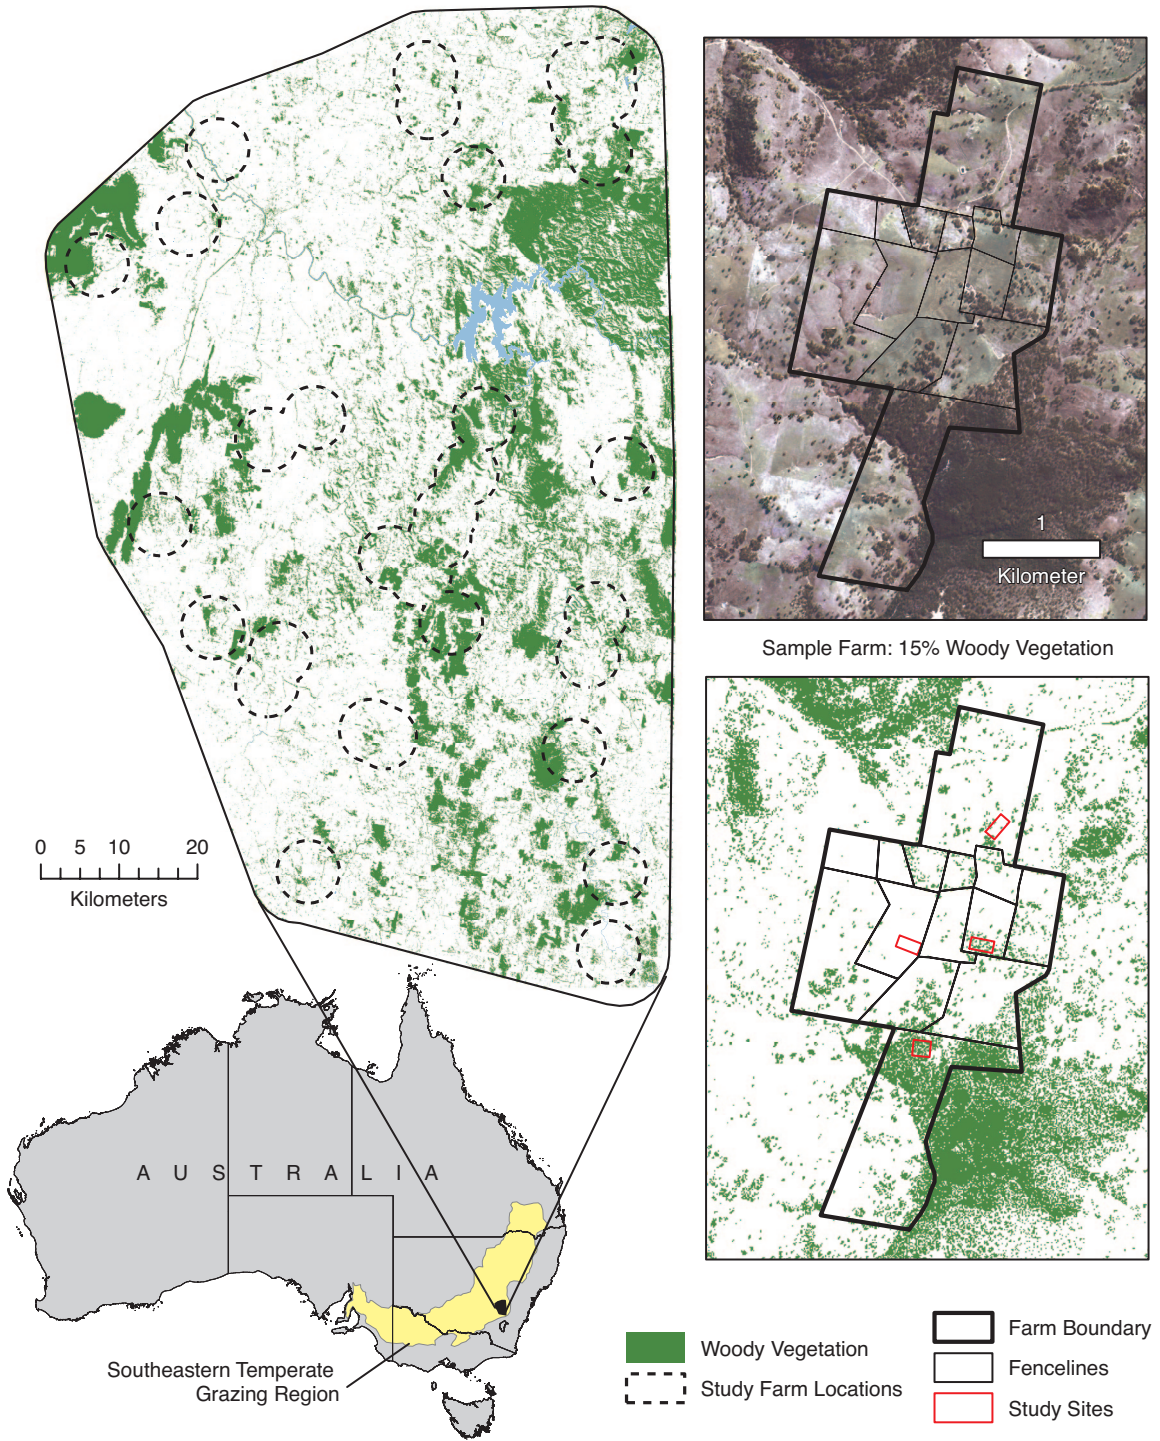

**Fig. S1.** Location of southeastern Australia's temperate grazing region, with our study area in the Upper Lachlan Catchment of New South Wales highlighted. The temperate grazing region is based on the Southern Temperate Beef Industry Region (adapted from [www.anra.gov.au/](http://www.anra.gov.au/)). The approximate location of the 33 farms surveyed is shown on top of our regional classification of tree cover. To illustrate the quality of the classification, both SPOT imagery and our classified map of tree cover are shown for 1 farm. Superimposed are paddock boundaries (black) and site perimeters (red).

**Management actions  
(past and present)**

- Management of tree cover (clearing, retention, planting): *quantified via remote sensing and tree surveys at field sites*
  
- Nutrient inputs (associated with fertilizer use): *quantified via soil chemistry analyses*
  
- Livestock grazing (stocking rate and stock rotation; stock exclusion): *quantified via interviews with farmers*

**Seedling establishment**

- Source limitation (seed supply)*
- Year-to-year variability in flowering intensity
  - Number of parent trees
- Germination limitation*
- Seed predation (e.g. by ants)
  - Seedbed conditions (e.g. compaction, exposure of bare ground)
  - Soil moisture
  - Soil nutrient levels
  - Pasture biomass
  - Fire
- Establishment limitation*
- Livestock grazing/browsing
  - Grazing/browsing by other vertebrates
  - Insect herbivory
  - Pathogen attack
  - Soil moisture
  - Competition with pasture species
  - Fire
  - Trampling by livestock
  - Soil nutrient levels

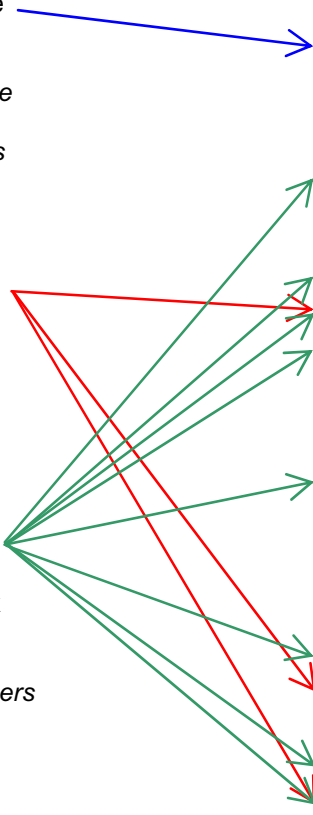

**Fig. S2.** Framework summarizing key variables affecting eucalypt regeneration [adapted from Acácio V, Holmgren M, Jansen PA, Schrotter O (2007) *Ecosystems* 10:1220–1230, and Vesik PA, Dorrrough JW (2006) *Aust J Bot* 54:509–519]. The left column shows management actions offering potential leverage points for changing patterns of tree regeneration on the regional scale. Variables related to these actions were of particular interest in the design of the study, whereas variables less amenable to management action (e.g., year-to-year variability in flowering intensity) or operating at finer scales (e.g., seed predation by ants) were not of primary interest. The application of different grazing regimes can affect a range of variables related to germination and seedling establishment.

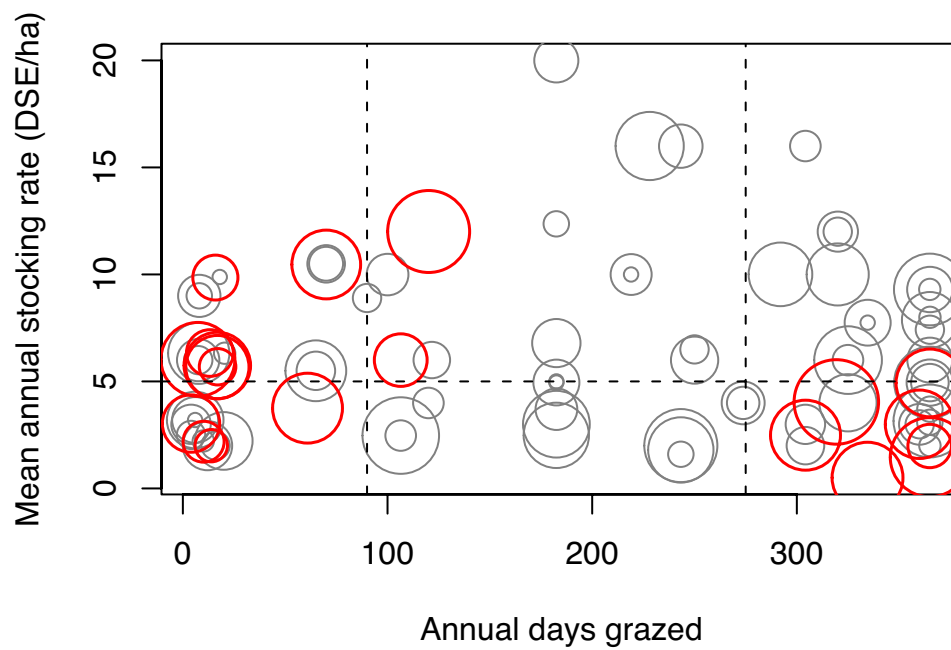

**Fig. S3.** Scatterplot showing the livestock grazing regime applied for the last 6 years at the grazed sites in the study. The size of the plotting symbol increases with the number of trees at the site. Stocking rates above 5 DSE per hectare were considered “high” (as opposed to “low”). Rotation regimes were fast rotation for up to 90 days of grazing per year, continuous grazing for more than 275 days per year, and slow rotation for intermediate grazing regimes. Sites plotted in red had seedlings, whereas those plotted in gray had none. In addition to the sites shown here, there were 17 ungrazed woodland sites, 15 of which had seedlings. Note that the presence of seedlings was unknown when sites were first established.

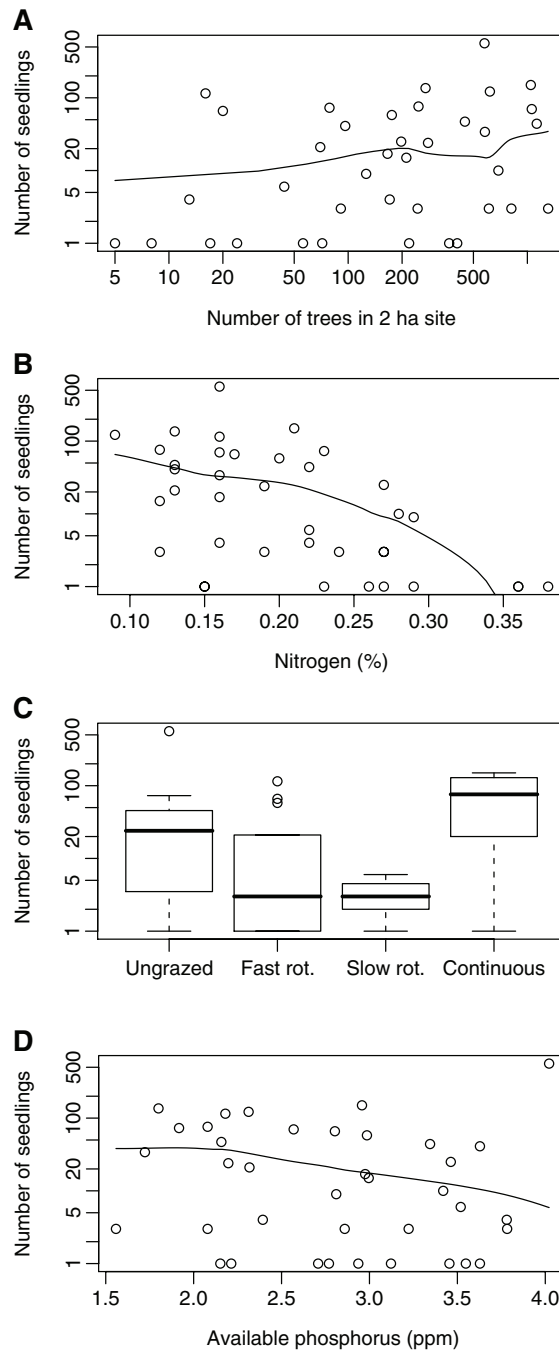

**Fig. S4.** Graphical display of the 38 sites with more than 1 seedling, in relation to those variables significantly explaining the presence of seedlings, or minimum tree diameter. (A) Relationship with tree density; (B) relationship with soil nitrogen; (C) relationship with grazing regime; (D) relationship with soil phosphorus. Smooth lines are fitted for illustration purposes only; formal significance tests were not conducted because data were limited.

**Table S1. Results from linear regression of the number of trees at a site as a function of remotely sensed tree cover within 2 ha in percent**

| Variable           | Estimate | Standard error | <i>P</i> |
|--------------------|----------|----------------|----------|
| Intercept          | 0.570    | 0.226          |          |
| Tree cover         | 0.745    | 0.217          | <0.001   |
| Tree cover squared | 0.102    | 0.0439         | 0.021    |

Both response and explanatory variables were log-transformed prior to analysis (after the addition of one to avoid zero values). The model reported here includes both primary survey sites and validation sites. The same variables were significant when only primary survey sites were included. The model explained 81% of variability in the response.

**Table S2. Results from linear mixed model of the minimum diameter of trees at a site as a function of the number of trees at a site and available soil phosphorus**

| Variable             | Estimate | Standard error | <i>P</i> |
|----------------------|----------|----------------|----------|
| Intercept            | −0.806   | 0.527          |          |
| Number of trees      | −0.666   | 0.0493         | <0.001   |
| Available phosphorus | 0.313    | 0.143          | 0.031    |

The minimum diameter of trees was modeled as a unit-free index (see *Methods*), with most values ranging between 0 and 1. Both explanatory variables were log-transformed prior to analysis because they were highly skewed. Farm was fitted as a random effect. The variance component associated with the random effect was 0.13, and the residual variance component was 0.80. The model reported here includes both primary survey sites and validation sites. The same variables were significant when only primary survey sites were included.



**Table S3. Results from generalized linear mixed model of the presence of seedlings at a site as a function of total soil nitrogen, livestock rotation regime, and number of trees at the site**

| Variable                                   | Estimate | Standard error | <i>P</i> |
|--------------------------------------------|----------|----------------|----------|
| Intercept                                  | 0.4923   | 0.5420         |          |
| Number of trees                            | 0.7393   | 0.1997         | <0.001   |
| Total soil nitrogen                        | -8.294   | 3.337          | 0.013    |
| Rotation regime (baseline = fast rotation) |          | 0.9959         | 0.004    |
| Continuous grazing                         | -2.200   |                |          |
| Slow rotation                              | -2.485   |                |          |
| Ungrazed                                   | 0.258    |                |          |

Logit link function and binomial error distribution were used. The number of trees at a site was log-transformed prior to analysis because it was highly skewed. Farm was fitted as a random effect. The variance component associated with the random effect was 0.82, and the residual variance component was fixed at 1. The mean standard error of differences between the treatments is shown for rotation regime. The model reported here includes both primary survey sites and validation sites. The same variables were significant when only primary survey sites were included.

**Table S4. Conservatively estimated list of the birds, mammals, and reptiles in the study area that use trees or tree-derived features (such as logs or litter) as habitat**

| Scientific name                   | Common name                | Key habitat feature used     | Likely user of scattered trees |
|-----------------------------------|----------------------------|------------------------------|--------------------------------|
| <b>Birds</b>                      |                            |                              |                                |
| <i>Dromaius novaehollandiae</i>   | Emu                        | Trees for shelter            | Yes                            |
| <i>Chenonetta jubata</i>          | Australian Wood Duck       | Tree hollows                 | Yes                            |
| <i>Tadorna tadornoides</i>        | Australian Shelduck        | Tree hollows                 | Yes                            |
| <i>Anas superciliosa</i>          | Pacific Black Duck         | Stumps and tree hollows      | Yes                            |
| <i>Anas gracilis</i>              | Grey Teal                  | Tree hollows                 | Yes                            |
| <i>Accipiter cirrhocephalus</i>   | Collared Sparrowhawk       | Trees for nesting            | Yes                            |
| <i>Accipiter fasciatus</i>        | Brown Goshawk              | Trees for nesting            | Yes                            |
| <i>Hieraaetus morphnoides</i>     | Little Eagle               | Trees for nesting            | Yes                            |
| <i>Aquila audax</i>               | Wedge-tailed Eagle         | Trees for nesting            | Yes                            |
| <i>Falco berigora</i>             | Brown Falcon               | Trees for nesting            | Yes                            |
| <i>Falco cenchroides</i>          | Nankeen Kestrel            | Trees for nesting            | Yes                            |
| <i>Falco longipennis</i>          | Australian Hobby           | Trees for nesting            | Yes                            |
| <i>Geopelia striata</i>           | Peaceful Dove              | Trees for nesting            | No                             |
| <i>Phaps chalcoptera</i>          | Common Bronzewing          | Trees and stumps for nesting | Yes                            |
| <i>Ocyphaps lophotes</i>          | Crested Pigeon             | Trees for nesting            | Yes                            |
| <i>Callocephalon fimbriatum</i>   | Gang-gang Cockatoo         | Tree hollows                 | No                             |
| <i>Cacatua roseicapilla</i>       | Galah                      | Tree hollows                 | Yes                            |
| <i>Cacatua sanguinea</i>          | Little Corella             | Tree hollows                 | Yes                            |
| <i>Cacatua galerita</i>           | Sulphur-crested Cockatoo   | Tree hollows                 | Yes                            |
| <i>Glossopsitta pusilla</i>       | Little Lorikeet            | Tree hollows                 | Yes                            |
| <i>Polytelis swainsonii</i>       | Superb Parrot              | Tree hollows                 | Yes                            |
| <i>Nymphicus hollandicus</i>      | Cockatiel                  | Tree hollows                 | Yes                            |
| <i>Platycercus elegans</i>        | Crimson Rosella            | Tree hollows                 | Yes                            |
| <i>Platycercus eximius</i>        | Eastern Rosella            | Tree hollows                 | Yes                            |
| <i>Psephotus haematonotus</i>     | Red-rumped Parrot          | Tree hollows and stumps      | Yes                            |
| <i>Neophema pulchella</i>         | Turquoise Parrot           | Stumps                       | Yes                            |
| <i>Cacomantis pallidus</i>        | Pallid Cuckoo              | Trees for nesting            | Yes                            |
| <i>Cacomantis flabelliformis</i>  | Fan-tailed Cuckoo          | Trees for nesting            | No                             |
| <i>Chrysococcyx basalis</i>       | Horsfield's Bronze-cuckoo  | Trees for nesting            | Yes                            |
| <i>Chrysococcyx lucidus</i>       | Shining Bronze-cuckoo      | Trees for nesting            | No                             |
| <i>Ninox novaeseelandiae</i>      | Southern Boobook           | Tree hollows                 | Yes                            |
| <i>Dacelo novaeguineae</i>        | Laughing Kookaburra        | Tree hollows                 | Yes                            |
| <i>Todiramphus sanctus</i>        | Sacred Kingfisher          | Tree hollows                 | Yes                            |
| <i>Merops ornatus</i>             | Rainbow Bee-eater          |                              | Yes                            |
| <i>Eurystomus orientalis</i>      | Dollarbird                 | Tree hollows                 | Yes                            |
| <i>Cormobates leucophaeus</i>     | White-throated Treecreeper | Tree hollows                 | Yes                            |
| <i>Climacteris picumnus</i>       | Brown Treecreeper          | Tree hollows and stumps      | Yes                            |
| <i>Malurus cyaneus</i>            | Superb Fairy-wren          | Dense foliage                | No                             |
| <i>Pardalotus punctatus</i>       | Spotted Pardalote          | Canopy                       | No                             |
| <i>Pardalotus striatus</i>        | Striated Pardalote         | Tree hollows                 | Yes                            |
| <i>Sericornis frontalis</i>       | White-browed Scrubwren     | Dense foliage                | No                             |
| <i>Chthonicola sagittata</i>      | Speckled Warbler           | Trees for nesting            | No                             |
| <i>Gerygone fusca</i>             | Western Gerygone           | Trees for nesting            | Yes                            |
| <i>Gerygone olivacea</i>          | White-throated Gerygone    | Trees for nesting            | Yes                            |
| <i>Acanthiza pusilla</i>          | Brown Thornbill            | Trees for nesting            | No                             |
| <i>Acanthiza reguloides</i>       | Buff-rumped Thornbill      | Trees for nesting            | No                             |
| <i>Acanthiza chrysorrhoa</i>      | Yellow-rumped Thornbill    | Trees for nesting            | Yes                            |
| <i>Acanthiza lineata</i>          | Striated Thornbill         | Trees for nesting            | No                             |
| <i>Acanthiza nana</i>             | Yellow Thornbill           | Trees for nesting            | No                             |
| <i>Smicronis brevirostris</i>     | Weebill                    | Trees for nesting            | Yes                            |
| <i>Aphelocephala leucopsis</i>    | Southern Whiteface         | Tree hollows and stumps      | Yes                            |
| <i>Anthochaera carunculata</i>    | Red Wattlebird             | Trees for nesting            | Yes                            |
| <i>Philemon citreogularis</i>     | Little Friarbird           | Trees for nesting            | Yes                            |
| <i>Philemon corniculatus</i>      | Noisy Friarbird            | Trees for nesting            | Yes                            |
| <i>Acanthagenys rufogularis</i>   | Spiny-cheeked Honeyeater   | Trees for nesting            | Yes                            |
| <i>Plectorhyncha lanceolata</i>   | Striped Honeyeater         | Trees for nesting            | Yes                            |
| <i>Entomyzon cyanotis</i>         | Blue-faced Honeyeater      | Trees for nesting            | Yes                            |
| <i>Manorina melanocephala</i>     | Noisy Miner                | Trees for nesting            | Yes                            |
| <i>Lichenostomus chrysops</i>     | Yellow-faced Honeyeater    | Trees for nesting            | Yes                            |
| <i>Lichenostomus leucotis</i>     | White-eared Honeyeater     | Trees for nesting            | Yes                            |
| <i>Lichenostomus fuscus</i>       | Fuscous Honeyeater         | Trees for nesting            | Yes                            |
| <i>Lichenostomus penicillatus</i> | White-plumed Honeyeater    | Trees for nesting            | Yes                            |

| Scientific name                     | Common name                    | Key habitat feature used | Likely user of scattered trees |
|-------------------------------------|--------------------------------|--------------------------|--------------------------------|
| <i>Melithreptus brevirostris</i>    | Brown-headed Honeyeater        | Trees for nesting        | No                             |
| <i>Acanthorhynchus tenuirostris</i> | Eastern Spinebill              | Trees for nesting        | Yes                            |
| <i>Microeca fascinans</i>           | Jacky Winter                   | Trees for nesting        | Yes                            |
| <i>Petroica multicolor</i>          | Scarlet Robin                  | Trees for nesting        | No                             |
| <i>Petroica goodenovii</i>          | Red-capped Robin               | Trees for nesting        | No                             |
| <i>Eopsaltria australis</i>         | Eastern Yellow Robin           | Trees for nesting        | No                             |
| <i>Melanodryas cucullata</i>        | Hooded Robin                   | Trees for nesting        | No                             |
| <i>Pomatostomus superciliosus</i>   | White-browed Babbler           | Trees for nesting        | No                             |
| <i>Pomatostomus temporalis</i>      | Grey-crowned Babbler           | Trees for nesting        | Yes                            |
| <i>Daphoenositta chrysoptera</i>    | Varied Sittella                | Trees for nesting        | No                             |
| <i>Falcunculus frontatus</i>        | Crested Shrike-tit             | Trees for nesting        | No                             |
| <i>Pachycephala pectoralis</i>      | Golden Whistler                | Trees for nesting        | No                             |
| <i>Pachycephala rufiventris</i>     | Rufous Whistler                | Trees for nesting        | Yes                            |
| <i>Colluricincla harmonica</i>      | Grey Shrike-thrush             | Trees for nesting        | Yes                            |
| <i>Myiagra rubecula</i>             | Leaden Flycatcher              | Trees for nesting        | Yes                            |
| <i>Myiagra inquieta</i>             | Restless Flycatcher            | Trees for nesting        | Yes                            |
| <i>Rhipidura leucophrys</i>         | Willie Wagtail                 | Trees for nesting        | Yes                            |
| <i>Rhipidura fuliginosa</i>         | Grey Fantail                   | Trees for nesting        | Yes                            |
| <i>Coracina novaehollandiae</i>     | Black-faced Cuckoo-shrike      | Trees for nesting        | Yes                            |
| <i>Lalage sueurii</i>               | White-winged Triller           | Trees for nesting        | Yes                            |
| <i>Oriolus sagittatus</i>           | Olive-backed Oriole            | Trees for nesting        | Yes                            |
| <i>Artamus superciliosus</i>        | White-browed Woodswallow       | Trees and stumps         | Yes                            |
| <i>Artamus personatus</i>           | Masked Woodswallow             | Trees and stumps         | Yes                            |
| <i>Artamus cinereus</i>             | Black-faced Woodswallow        | Trees and stumps         | Yes                            |
| <i>Artamus cyanopterus</i>          | Dusky Woodswallow              | Trees and stumps         | Yes                            |
| <i>Cracticus torquatus</i>          | Grey Butcherbird               | Trees for nesting        | Yes                            |
| <i>Cracticus nigrogularis</i>       | Pied Butcherbird               | Trees for nesting        | Yes                            |
| <i>Grallina cyanoleuca</i>          | Magpie-lark                    | Trees for nesting        | Yes                            |
| <i>Gymnorhina tibicen</i>           | Australian Magpie              | Trees for nesting        | Yes                            |
| <i>Strepera graculina</i>           | Pied Currawong                 | Trees for nesting        | Yes                            |
| <i>Corvus coronoides</i>            | Australian Raven               | Trees for nesting        | Yes                            |
| <i>Corvus mellori</i>               | Little Raven                   | Trees for nesting        | Yes                            |
| <i>Struthidea cinerea</i>           | Apostlebird                    | Trees for nesting        | Yes                            |
| <i>Corcorax melanorhamphos</i>      | White-winged Chough            | Trees for nesting        | Yes                            |
| <i>Anthus novaeseelandiae</i>       | Richard's Pipit                |                          | Yes                            |
| <i>Neochmia temporalis</i>          | Red-browed Finch               | Trees for nesting        | Yes                            |
| <i>Taeniopygia guttata</i>          | Zebra Finch                    | Trees for nesting        | Yes                            |
| <i>Stagonopleura guttata</i>        | Diamond Firetail               | Trees for nesting        | No                             |
| <i>Dicaeum hirundinaceum</i>        | Mistletoebird                  | Trees for nesting        | Yes                            |
| <i>Hirundo neoxena</i>              | Welcome Swallow                | Trees for nesting        | Yes                            |
| <i>Cheramoeca leucosternus</i>      | White-backed Swallow           |                          | Yes                            |
| <i>Hirundo nigricans</i>            | Tree Martin                    | Trees for nesting        | Yes                            |
| <i>Hirundo ariel</i>                | Fairy Martin                   | Trees for nesting        | Yes                            |
| <i>Cincloramphus cruralis</i>       | Brown Songlark                 | Trees for perching       | Yes                            |
| <i>Cincloramphus mathewsi</i>       | Rufous Songlark                | Trees for perching       | Yes                            |
| <i>Zosterops lateralis</i>          | Silvereye                      | Trees for feeding        | Yes                            |
| <b>Mammals</b>                      |                                |                          |                                |
| <i>Tachyglossus aculeatus</i>       | Short-beaked Echidna           | Logs and rotting wood    | Yes                            |
| <i>Antechinus flavipes</i>          | Yellow-footed Antechinus       | Tree hollows and logs    | No                             |
| <i>Antechinus stuartii</i>          | Brown Antechinus               | Tree hollows             | No                             |
| <i>Sminthopsis murina</i>           | Common Dunnart                 | Logs                     | No                             |
| <i>Trichosurus vulpecula</i>        | Common Brushtail Possum        | Tree hollows and logs    | Yes                            |
| <i>Petaurus breviceps</i>           | Sugar Glider                   | Tree hollows             | Yes                            |
| <i>Petaurus norfolcensis</i>        | Squirrel Glider                | Tree hollows             | Yes                            |
| <i>Pseudocheirus peregrinus</i>     | Common Ringtail Possum         | Tree hollows             | Yes                            |
| <i>Macropus giganteus</i>           | Eastern Grey Kangaroo          | Trees for shade/shelter  | Yes                            |
| <i>Macropus robustus</i>            | Common Wallaroo                | Trees for shade/shelter  | Yes                            |
| <i>Macropus rufogriseus</i>         | Red-necked Wallaby             | Trees for shade/shelter  | No                             |
| <i>Wallabia bicolor</i>             | Swamp Wallaby                  | Trees for shade/shelter  | Yes                            |
| <i>Pteropus scapulatus</i>          | Little Red Flying-Fox          | Roosts in trees          | Yes                            |
| <i>Saccolaimus flaviventris</i>     | Yellow-bellied Sheath-tail bat | Tree hollows             | Yes                            |
| <i>Tadarida australis</i>           | White-stiped Freetail Bat      | Tree hollows             | Yes                            |
| <i>Mormopterus planiceps</i>        | Little Mastiff-bat             | Tree hollows             | Yes                            |

| Scientific name                 | Common name             | Key habitat feature used       | Likely user of scattered trees |
|---------------------------------|-------------------------|--------------------------------|--------------------------------|
| <i>Mormopterus</i> spp.         | Other species           | Tree hollows                   | Yes                            |
| <i>Chalinolobus gouldii</i>     | Gould's Wattled Bat     | Tree hollows                   | Yes                            |
| <i>Chalinolobus morio</i>       | Chocolate Wattled Bat   | Tree hollows                   | Yes                            |
| <i>Vespadalus darlingtoni</i>   | Large Forest Bat        | Tree hollows                   | Yes                            |
| <i>Vespadalus regulus</i>       | Southern Forest Bat     | Tree hollows                   | Yes                            |
| <i>Vespadalus vulturnus</i>     | Little Forest Bat       | Tree hollows                   | Yes                            |
| <i>Scotorepens balstoni</i>     | Inland Broad-nosed Bat  | Tree hollows                   | Yes                            |
| <i>Nyctophilus geoffroyi</i>    | Lesser Long-eared Bat   | Tree hollows                   | Yes                            |
| <i>Nyctophilus gouldi</i>       | Gould's Long-eared Bat  | Tree hollows and under bark    | Yes                            |
| <i>Rattus fuscipes</i>          | Bush Rat                | Logs                           | No                             |
| <b>Reptiles</b>                 |                         |                                |                                |
| <i>Christinus marmoratus</i>    | Marbled Gecko           | Loose bark, logs               | Yes                            |
| <i>Diplodactylus vittatus</i>   | Eastern Stone Gecko     | Logs, litter                   | Yes                            |
| <i>Delma inornata</i>           | Olive Legless Lizard    | Logs                           | Yes                            |
| <i>Lialis burtonis</i>          | Burton's Snake-lizard   | Logs, litter                   | Yes                            |
| <i>Acritoscincus platynotum</i> | Red-throated Skink      | Logs, litter                   | Yes                            |
| <i>Carlia tetradactyla</i>      | Southern Rainbow Skink  | Logs, litter                   | Yes                            |
| <i>Ctenotus robustus</i>        | Eastern Striped Skink   | Logs and litter                | Yes                            |
| <i>Ctenotus taeniolatus</i>     | Copper-tailed Skink     | Logs                           | Yes                            |
| <i>Egernia cunninghami</i>      | Cunningham's Skink      | Logs                           | Yes                            |
| <i>Egernia saxatilis</i>        | Black Rock Skink        | Logs                           | No                             |
| <i>Egernia striolata</i>        | Tree Skink              | Tree hollows, under bark, logs | Yes                            |
| <i>Egernia whittii</i>          | White's Skink           | Logs                           | No                             |
| <i>Hemiergis decresiensis</i>   | Three-toed Skink        | Logs                           | No                             |
| <i>Lampropholis delicata</i>    | Garden Skink            | Litter                         | Yes                            |
| <i>Lampropholis guichenoti</i>  | Grass Skink             | Litter                         | Yes                            |
| <i>Morethia boulengeri</i>      | Boulenger's Skink       | Logs and under bark            | Yes                            |
| <i>Tiliqua rugosa</i>           | Shingleback             | Logs and Litter                | Yes                            |
| <i>Tiliqua scincoides</i>       | Common Blue-tongue      | Logs                           | Yes                            |
| <i>Amphibolurus muricatus</i>   | Jacky Dragon            | Logs and fallen timber         | Yes                            |
| <i>Pogona barbata</i>           | Common Bearded Dragon   | Logs, stumps                   | Yes                            |
| <i>Varanus varius</i>           | Lace Monitor            | Often aboreal                  | Yes                            |
| <i>Ramphotyphlops</i> spp.      | Blind snakes            | Logs                           | Yes                            |
| <i>Morelia spilota</i>          | Carpet Python           | Often aboreal                  | Yes                            |
| <i>Parasuta dwyeri</i>          | Dwyer's Snake           | Logs                           | Yes                            |
| <i>Pseudechis porphyriacus</i>  | Red-bellied Black Snake | Logs                           | Yes                            |
| <i>Pseudonaja textilis</i>      | Eastern Brown Snake     | Logs                           | Yes                            |
| <i>Vermicella annulata</i>      | Bandy-bandy             | Logs                           | Yes                            |

Likely use of scattered trees is also indicated. Data are based on range maps, publicly accessible databases, field guides, and local knowledge.
